# Supplementary material for: Individual participant data systematic reviews with meta-analyses of psychotherapies for borderline personality disorder: A protocol
Source: bioRxiv or medRxiv preprint supplement (doi:10.1101/2020.11.27.20238394), 2020-11-30
Supplement: Supplementary file [file media-1.pdf]

## S1 - Search strings from Storebø et al. 2020

### **Cochrane Central Register of Controlled Trials, in the Cochrane Library**

- #1 MeSH descriptor: [Borderline Personality Disorder] explode all trees
- #2 borderline next state\*
- #3 borderline next personalit\*
- #4 "axis II" or "cluster B"
- #5 idealization next devaluation
- #6 (vulnerable or hyperbolic) next temper\*
- #7 (((unstab\* or instab\* or poor or disturb\* or fail\* or weak\* or dysregulat\*) next (self\* or impuls\* or interperson\* or identit\* or relation\* or emotion\* or affect\*)) and (person\* or character or PD))
- #8 impulsiv\* near personalit\*
- #9 (self next (injur\* or damag\* or destruct\* or harm\* or hurt\* or mutilat\*))
- #10 suicidal next behavio?r
- #11 (feel\* next (empt\* or bored\*))
- #12 (anger next control\*)
- #13 (risk-taking next (behavior or behaviour))
- #14 #1 or #2 or #3 or #4 or #5 or #6 or #7 or #8 or #9 or #10 or #11 or #12 or #13

### **Medline Ovid**

- 1 Borderline Personality Disorder/
- 2 ((borderline or border-line) adj3 (state\* or personalit\*)).kf,tw.
- 3 ("Axis II" or "Cluster B" or flamboyant or "F60.3" or "F60.30" or "F60.31").kf,tw.
- 4 (idealization adj5 devaluation).kf,tw.
- 5 ((vulnerable or hyperbolic) adj3 temperament).kf,tw.
- 6 (((unstab\* or instab\* or poor or disturb\* or fail\* or weak or dysregulat\*) adj3 (self\* or impuls\* or interperson\* or identit\* or relationship\* or emotion\* or affect\*)) and (personality or character or PD)).kf,tw.
- 7 (impulsiv\* adj5 (behavio?r or character or personalit\*)).kf,tw.
- 8 (self adj3 (injur\* or damag\* or destruct\* or harm\* or hurt\* or mutilat\*)).kf,tw.
- 9 (suicidal adj3 behavio?r).kf,tw.
- 10 (feel\* adj3 (empt\* or bored\*)).kf,tw.
- 11 (anger adj5 control\*).kf,tw.
- 12 (risk-taking adj3 behavio?r).kf,tw.
- 13 or/1-12
- 14 randomised controlled trial.pt.
- 15 controlled clinical trial.pt.
- 16 randomi#ed.ab.
- 17 placebo.ab.
- 18 randomly.ab.
- 19 trial.ab.
- 20 groups.ab.
- 21 drug therapy.fs.
- 22 or/14-21
- 23 exp Animals/ not Humans/
- 24 22 not 23
- 25 13 and 24
